# Supplementary material for: The effects of mitral stenosis on right ventricular mechanics assessed by three-dimensional echocardiography
Source: PubMed Central journal article supplement (PMC11269591; doi:10.1038/s41598-024-68126-y), 2024-07-24
Supplement: 41598_2024_68126_MOESM1_ESM.pdf [file 41598_2024_68126_MOESM1_ESM.pdf]

**The effects of mitral stenosis on right ventricular mechanics assessed by three-dimensional echocardiography**

Zsuzsanna Ladányi <sup>1\*</sup>, Abdalla Eltayeb <sup>2</sup>, Alexandra Fábián <sup>1</sup>, Adrienn Ujvári <sup>1</sup>, Máté Tolvaj <sup>1</sup>, Márton Tokodi <sup>1,3</sup>, Kashif Anwar Choudhary <sup>2</sup>, Attila Kovács <sup>1,3</sup>, Béla Merkely <sup>1</sup>, Olga Vríz <sup>2,4</sup>, Bálint Károly Lakatos <sup>1</sup>

<sup>1</sup> Heart and Vascular Center, Semmelweis University, Budapest, Hungary

<sup>2</sup> King Faisal Specialist Hospital and Research Center Hospital, Riyadh, Saudi Arabia

<sup>3</sup> Department of Surgical Research and Techniques, Semmelweis University, Budapest, Hungary

<sup>4</sup> Ospedale Sant'Antonio, San Daniele del Friuli, Italy

**\* Correspondence:**

**Zsuzsanna Ladányi MD**

email: lazszs9@gmail.com

phone: +3614586810

address: Varosmajor utca 68, Budapest, Hungary 1122

**Supplementary Table 1: Correlations of 3D right ventricular echocardiographic measures with conventional parameters**

|                     | Age (years)                      | LVEDVi (ml)                      | LVESVi (ml)         | LVEF (%)            | LVGLS (%)                            | LAVi (ml/m <sup>2</sup> ) | MV area (cm <sup>2</sup> ) | Mean mitral valve gradient (mmHg) | PASP (mmHg)                      | TAPSE (mm)                        | FAC (%)                             | RAVi (ml/m <sup>2</sup> )           |
|---------------------|----------------------------------|----------------------------------|---------------------|---------------------|--------------------------------------|---------------------------|----------------------------|-----------------------------------|----------------------------------|-----------------------------------|-------------------------------------|-------------------------------------|
| <b>RV EF (%)</b>    | r=0.155<br>p=0.345               | r=0.152<br>p=0.357               | r=0.046<br>p=0.779  | r=0.132<br>p=0.425  | <b>r=-0.631</b><br><b>p&lt;0.001</b> | r=-0.094<br>p=0.582       | r=0.294<br>p=0.069         | r=-0.279<br>p=0.086               | r=-0.180<br>p=0.287              | <b>r=0.442</b><br><b>p=0.005</b>  | <b>r=0.549</b><br><b>p&lt;0.001</b> | <b>r=-0.332</b><br><b>p=0.039</b>   |
| <b>RV GCS (%)</b>   | r=-0.080<br>p=0.630              | r=-0.092<br>p=0.578              | r=-0.096<br>p=0.561 | r=0.025<br>p=0.880  | <b>r=0.633</b><br><b>p&lt;0.001</b>  | r=0.123<br>p=0.470        | r=-0.144<br>p=0.381        | r=0.134<br>p=0.415                | r=0.119<br>p=0.482               | <b>r=-0.366</b><br><b>p=0.024</b> | <b>r=-0.432</b><br><b>p=0.006</b>   | r=-0.298<br>p=0.065                 |
| <b>RV GLS (%)</b>   | r=-0.068<br>p=0.681              | r=-0.281<br>p=0.083              | r=-0.197<br>p=0.229 | r=-0.026<br>p=0.878 | r=0.165<br>p=0.374                   | r=-0.083<br>p=0.626       | r=-0.241<br>p=0.139        | r=0.156<br>p=0.344                | r=0.159<br>p=0.347               | <b>r=-0.325</b><br><b>p=0.047</b> | <b>r=-0.463</b><br><b>p=0.003</b>   | <b>r=0.389</b><br><b>p=0.014</b>    |
| <b>RV EDVi (ml)</b> | r=-0.027<br>p=0.869              | r=0.276<br>p=0.089               | r=0.235<br>p=0.150  | r=-0.025<br>p=0.882 | r=-0.106<br>p=0.570                  | r=0.137<br>p=0.419        | r=0.173<br>p=0.292         | r=0.084<br>p=0.612                | r=0.325<br>p=0.050               | r=0.109<br>p=0.515                | r=0.068<br>p=0.683                  | <b>r=0.450</b><br><b>p=0.004</b>    |
| <b>RV ESVi (ml)</b> | r=-0.099<br>p=0.551              | r=0.147<br>p=0.373               | r=0.156<br>p=0.342  | r=-0.062<br>p=0.708 | r=0.175<br>p=0.348                   | r=0.162<br>p=0.338        | r=0.001<br>p=0.997         | r=0.209<br>p=0.203                | <b>r=0.370</b><br><b>p=0.024</b> | r=-0.101<br>p=0.547               | r=-0.203<br>p=0.216                 | <b>r=0.548</b><br><b>p&lt;0.001</b> |
| <b>RV SVi (ml)</b>  | r=0.061<br>p=0.714               | <b>r=0.339</b><br><b>p=0.035</b> | r=0.254<br>p=0.119  | r=0.025<br>p=0.882  | <b>r=-0.430</b><br><b>p=0.016</b>    | r=0.062<br>p=0.716        | r=0.315<br>p=0.051         | r=-0.081<br>p=0.624               | r=0.181<br>p=0.285               | r=0.313<br>p=0.056                | <b>r=0.351</b><br><b>p=0.029</b>    | r=0.207<br>p=0.206                  |
| <b>REF (%)</b>      | r=0.291<br>p=0.072               | r=0.155<br>p=0.346               | r=0.085<br>p=0.608  | r=0.060<br>p=0.716  | <b>r=-0.529</b><br><b>p=0.002</b>    | r=-0.079<br>p=0.643       | r=0.082<br>p=0.618         | r=-0.257<br>p=0.115               | r=-0.002<br>p=0.990              | <b>r=0.329</b><br><b>p=0.043</b>  | <b>r=0.348</b><br><b>p=0.030</b>    | r=-0.058<br>p=0.726                 |
| <b>REF/ RVEF</b>    | <b>r=0.347</b><br><b>p=0.031</b> | r=0.130<br>p=0.431               | r=0.098<br>p=0.552  | r=-0.003<br>p=0.987 | <b>r=-0.334</b><br><b>p=0.067</b>    | r=-0.024<br>p=0.890       | r=-0.085<br>p=0.607        | r=-0.178<br>p=0.279               | r=0.108<br>p=0.526               | r=0.164<br>p=0.324                | r=0.155<br>p=0.347                  | r=0.148<br>p=0.368                  |
| <b>AEF (%)</b>      | r=-0.129<br>p=0.433              | r=0.094<br>p=0.569               | r=-0.007<br>p=0.967 | r=0.116<br>p=0.481  | <b>r=-0.635</b><br><b>p&lt;0.001</b> | r=-0.156<br>p=0.355       | r=0.242<br>p=0.138         | r=0.005<br>p=0.974                | r=-0.107<br>p=0.530              | <b>r=0.351</b><br><b>p=0.031</b>  | <b>r=0.458</b><br><b>p=0.003</b>    | <b>r=-0.445</b><br><b>p=0.005</b>   |
| <b>AEF/ RVEF</b>    | r=-0.294<br>p=0.069              | r=0.005<br>p=0.977               | r=-0.060<br>p=0.719 | r=0.078<br>p=0.637  | <b>r=-0.438</b><br><b>p=0.014</b>    | r=-0.144<br>p=0.395       | r=0.152<br>p=0.357         | r=0.188<br>p=0.253                | r=-0.047<br>p=0.785              | r=0.190<br>p=0.254                | r=0.269<br>p=0.098                  | <b>r=-0.421</b><br><b>p=0.008</b>   |
| <b>LEF (%)</b>      | r=0.149<br>p=0.365               | r=0.170<br>p=0.300               | r=0.135<br>p=0.413  | r=0.015<br>p=0.928  | r=0.130<br>p=0.487                   | r=0.071<br>p=0.678        | r=0.226<br>p=0.166         | r=-0.195<br>p=0.235               | r=-0.262<br>p=0.117              | r=0.287<br>p=0.081                | r=0.240<br>p=0.141                  | r=-0.255<br>p=0.118                 |
| <b>LEF/ RVEF</b>    | r=0.063<br>p=0.704               | r=0.087<br>p=0.597               | r=0.117<br>p=0.479  | r=-0.064<br>p=0.700 | <b>r=0.443</b><br><b>p=0.013</b>     | r=0.099<br>p=0.559        | r=0.101<br>p=0.543         | r=-0.097<br>p=0.557               | r=-0.238<br>p=0.156              | r=0.087<br>p=0.603                | r=-0.029<br>p=0.860                 | r=-0.109<br>p=0.508                 |
| <b>SCS (%)</b>      | r=0.202<br>p=0.217               | r=0.074<br>p=0.653               | r=-0.002<br>p=0.988 | r=0.064<br>p=0.699  | <b>r=0.371</b><br><b>p=0.040</b>     | r=0.070<br>p=0.681        | r=-0.056<br>p=0.737        | r=-0.014<br>p=0.932               | r=0.183<br>p=0.280               | r=-0.210<br>p=0.206               | r=-0.106<br>p=0.523                 | r=0.238<br>p=0.145                  |
| <b>SLS (%)</b>      | r=0.184<br>p=0.263               | r=-0.115<br>p=0.486              | r=-0.057<br>p=0.733 | r=-0.072<br>p=0.663 | r=-0.238<br>p=0.198                  | r=-0.144<br>p=0.397       | r=-0.169<br>p=0.304        | r=0.116<br>p=0.481                | r=0.187<br>p=0.268               | r=-0.020<br>p=0.905               | r=-0.275<br>p=0.090                 | r=0.150<br>p=0.362                  |
| <b>FWCS (%)</b>     | r=-0.107<br>p=0.518              | r=-0.078<br>p=0.639              | r=-0.108<br>p=0.511 | r=0.058<br>p=0.724  | <b>r=0.587</b><br><b>p=0.001</b>     | r=0.114<br>p=0.501        | r=-0.106<br>p=0.521        | r=0.159<br>p=0.332                | r=0.142<br>p=0.403               | <b>r=-0.348</b><br><b>p=0.032</b> | <b>r=-0.425</b><br><b>p=0.007</b>   | r=0.286<br>p=0.077                  |
| <b>FWLS (%)</b>     | r=0.004<br>p=0.980               | r=-0.308<br>p=0.056              | r=-0.172<br>p=0.294 | r=-0.093<br>p=0.572 | r=0.217<br>p=0.242                   | r=-0.065<br>p=0.701       | r=-0.179<br>p=0.277        | r=0.028<br>p=0.864                | r=0.105<br>p=0.536               | r=-0.302<br>p=0.066               | <b>r=-0.474</b><br><b>p=0.002</b>   | <b>r=0.372</b><br><b>p=0.020</b>    |

Values with a significant correlation are presented in bold.

Abbreviations: LV = left ventricular, EDVi = end-diastolic volume index, ESVi = end-systolic volume index, EF = ejection fraction, GLS = global longitudinal strain, MV = mitral valve, LAVi = left atrial volume index, RAVi = right atrial volume index, TAPSE = tricuspid annular plane systolic excursion, PASP = pulmonary artery systolic pressure, TR = tricuspid valve regurgitation, RVAD = right ventricular area in diastole, RVAS = right ventricular area in systole, FAC = fractional area change, RV = right ventricle, EF = ejection fraction; GCS = global circumferential strain, GLS = longitudinal strain; EDVi = end-diastolic volume index; ESVi = end-systolic volume index; SVi = stroke volume index; REF = radial ejection fraction; AEF = anteroposterior ejection fraction; LEF = longitudinal ejection fraction; SEF = septal ejection fraction; SCS = septal circumferential strain; SLS = septal longitudinal strain; FWEF = free wall ejection fraction; FWCS = free wall circumferential strain; FWLS = free wall longitudinal strain

**Supplementary Table 2: The severity of tricuspid regurgitation in mitral stenosis patients with atrial fibrillation vs. in sinus rhythm**

|                            | No TR  | Mild TR  | Moderate TR | Severe TR |
|----------------------------|--------|----------|-------------|-----------|
| <b>Sinus rhythm</b>        | 2 (5%) | 15 (38%) | 4 (10%)     | 0 (0%)    |
| <b>Atrial fibrillation</b> | 0 (0%) | 7 (18%)  | 7 (18%)     | 4 (10%)   |

**p for trend = 0.02**

Data is presented as number of patients (%).

Abbreviations: TR = tricuspid regurgitation
